# Supplementary material
Source: ML conference proceedings conference paper supplement (https://openaccess.thecvf.com/content/ICCV2023/html/Peng_USAGE_A_Unified_ICCV_2023_paper.html)
Supplement: Supplementary file 1 [file Peng_USAGE_A_Unified_ICCV_2023_supplemental.pdf]

# USAGE: A Unified Seed Area Generation Paradigm for Weakly Supervised Semantic Segmentation

## -Supplementary Material-

Anonymous ICCV submission

Paper ID 1340

In this supplementary material, we provide more segmentation results (as shown in Fig. 1) as well as seed area comparison among different variants (as shown in Fig. 2).

### 1. More Segmentation Results

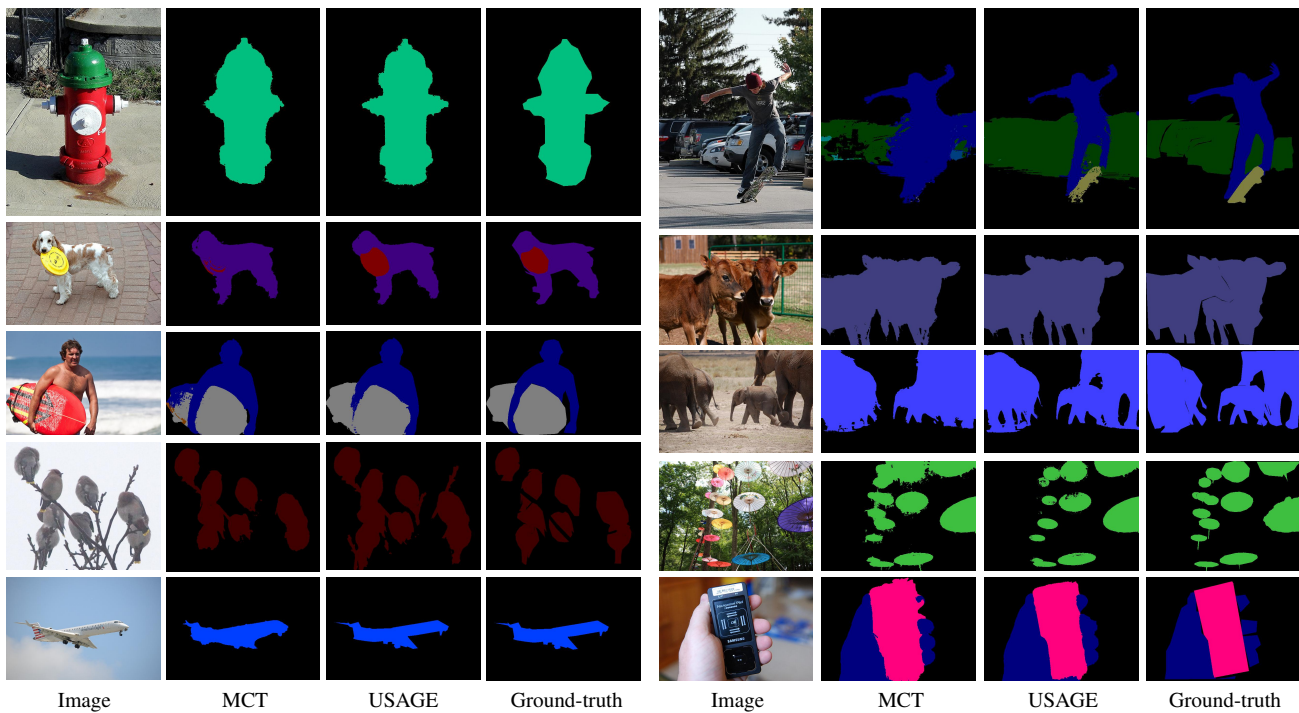

Figure 1. Segmentation results on the MS COCO [2] val set. MCT: Class-to-patch attention map [6].

## 2. Seed Area Comparison among Different Variants

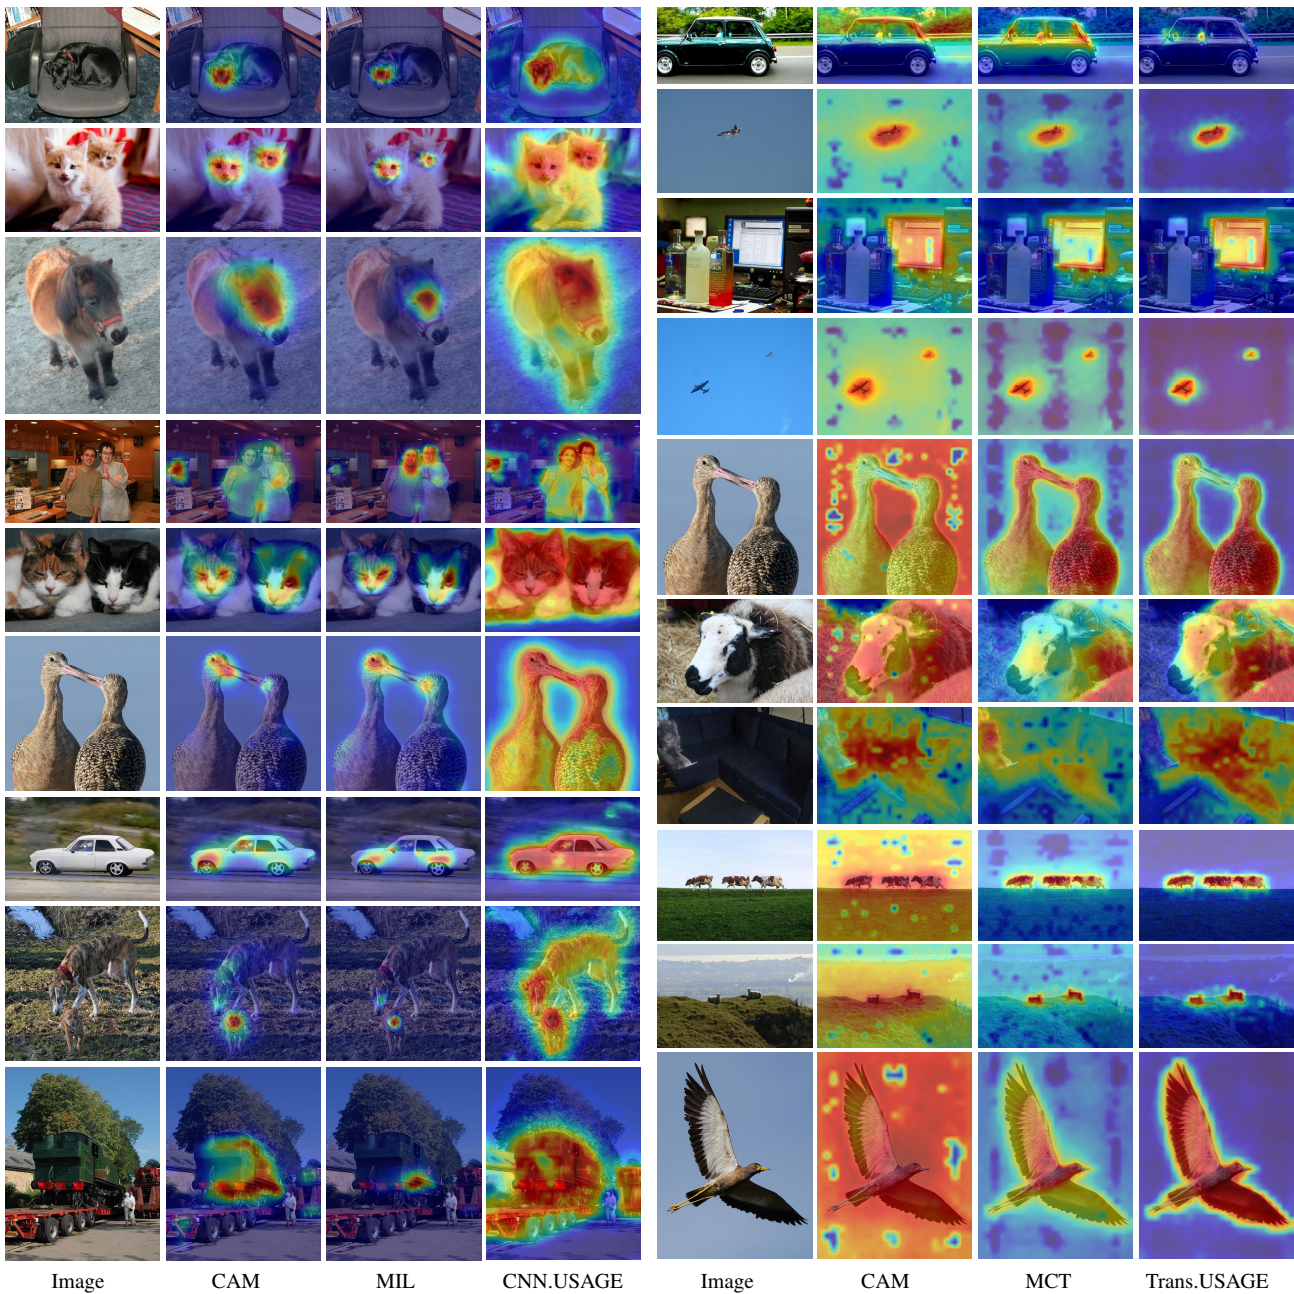

Figure 2. Seed area visualizations on the PASCAL VOC [1] *train* set. Left: Seed area generation from a CNN (ResNet38 [5]). Right: Seed area generation from a Transformer (DeiT-S [4]). MCT: Class-to-patch attention map [6]. MIL: a MIL-based method [3].

## References

- [1] Mark Everingham, Luc Van Gool, Christopher KI Williams, John Winn, and Andrew Zisserman. The pascal visual object classes (voc) challenge. *IJCV*, 88(2):303–338, 2010. 2
- [2] Tsung-Yi Lin, Michael Maire, Serge Belongie, James Hays, Pietro Perona, Deva Ramanan, Piotr Dollár, and C Lawrence Zitnick. Microsoft coco: Common objects in context. In *ECCV*, 2014. 1
- [3] Pedro O Pinheiro and Ronan Collobert. From image-level to pixel-level labeling with convolutional networks. In *CVPR*, 2015. 2

|     |                                                                                                                                            |     |
|-----|--------------------------------------------------------------------------------------------------------------------------------------------|-----|
| 216 | [4] Hugo Touvron, Matthieu Cord, Matthijs Douze, Francisco Massa, Alexandre Sablayrolles, and Hervé Jégou. Training data-efficient         | 270 |
| 217 | image transformers & distillation through attention. In <i>ICML</i> , 2021. 2                                                              | 271 |
| 218 | [5] Zifeng Wu, Chunhua Shen, and Anton Van Den Hengel. Wider or deeper: Revisiting the resnet model for visual recognition. <i>Pattern</i> | 272 |
| 219 | <i>Recognition</i> , 90:119–133, 2019. 2                                                                                                   | 273 |
| 220 | [6] Lian Xu, Wanli Ouyang, Mohammed Bennamoun, Farid Boussaid, and Dan Xu. Multi-class token transformer for weakly supervised             | 274 |
| 221 | semantic segmentation. In <i>CVPR</i> , 2022. 1, 2                                                                                         | 275 |
| 222 |                                                                                                                                            | 276 |
| 223 |                                                                                                                                            | 277 |
| 224 |                                                                                                                                            | 278 |
| 225 |                                                                                                                                            | 279 |
| 226 |                                                                                                                                            | 280 |
| 227 |                                                                                                                                            | 281 |
| 228 |                                                                                                                                            | 282 |
| 229 |                                                                                                                                            | 283 |
| 230 |                                                                                                                                            | 284 |
| 231 |                                                                                                                                            | 285 |
| 232 |                                                                                                                                            | 286 |
| 233 |                                                                                                                                            | 287 |
| 234 |                                                                                                                                            | 288 |
| 235 |                                                                                                                                            | 289 |
| 236 |                                                                                                                                            | 290 |
| 237 |                                                                                                                                            | 291 |
| 238 |                                                                                                                                            | 292 |
| 239 |                                                                                                                                            | 293 |
| 240 |                                                                                                                                            | 294 |
| 241 |                                                                                                                                            | 295 |
| 242 |                                                                                                                                            | 296 |
| 243 |                                                                                                                                            | 297 |
| 244 |                                                                                                                                            | 298 |
| 245 |                                                                                                                                            | 299 |
| 246 |                                                                                                                                            | 300 |
| 247 |                                                                                                                                            | 301 |
| 248 |                                                                                                                                            | 302 |
| 249 |                                                                                                                                            | 303 |
| 250 |                                                                                                                                            | 304 |
| 251 |                                                                                                                                            | 305 |
| 252 |                                                                                                                                            | 306 |
| 253 |                                                                                                                                            | 307 |
| 254 |                                                                                                                                            | 308 |
| 255 |                                                                                                                                            | 309 |
| 256 |                                                                                                                                            | 310 |
| 257 |                                                                                                                                            | 311 |
| 258 |                                                                                                                                            | 312 |
| 259 |                                                                                                                                            | 313 |
| 260 |                                                                                                                                            | 314 |
| 261 |                                                                                                                                            | 315 |
| 262 |                                                                                                                                            | 316 |
| 263 |                                                                                                                                            | 317 |
| 264 |                                                                                                                                            | 318 |
| 265 |                                                                                                                                            | 319 |
| 266 |                                                                                                                                            | 320 |
| 267 |                                                                                                                                            | 321 |
| 268 |                                                                                                                                            | 322 |
| 269 |                                                                                                                                            | 323 |
